# Supplementary material for: Systematic review with meta-analysis: effectiveness of hyperbaric oxygenation therapy for ulcerative colitis
Source: PubMed Central journal article supplement — Ther Adv Gastroenterol. 2021 Jul 17;14:17562848211023394. doi: 10.1177/17562848211023394 (PMC8290506; doi:10.1177/17562848211023394), 2021-07-17
Supplement: sj-pdf-1-tag-10.1177_17562848211023394.pdf [file sj-pdf-1-tag-10.1177_17562848211023394.pdf]

## Searching strategy except PubMed

### 1、Cochrane Library

- #1 Mesh descriptor: [Colitis, Ulcerative] explode all trees
- #2 hyperbaric and oxygen\*
- #3 Mesh descriptor: [Hyperbaric Oxygenation] explode all trees
- #4 hbo and hbot
- #5 high near/3 (pressure or tension)
- #6 (multiplace or monoplace) and chamber\*
- #7 #2 or #4 or #5 or #6
- #8 inflammatory bowel disease
- #9 UC
- #10 ulcerative colitis
- #11 colitis
- #12 #1 or #8 or #9 or #10 or #11
- #13 #12 and #7

### 2、Embase

- #1 'ulcerative colitis'/exp
- #2 (uc:ab,ti OR 'colitis ulcerative':ab,ti OR colitis:ab,ti OR ibd:ab,ti) AND 'inflammatory bowel disease':ab,ti
- #3 'hyperbaric oxygen therapy'/exp
- #4 'hyperbaric oxygenation':ab,ti
- #5 'hyperbaric oxygenation':ab,ti OR 'hyperbaric oxygenations':ab,ti OR (hyperbaric:ab,ti AND oxygen\*:ab,ti) OR hbo:ab,ti OR hbot:ab,ti
- #6 'hyperbaric chamber'/exp
- #7 #1 OR #2
- #8 #3 OR #4 OR #5 OR #6
- #9 #7 AND #8

### 3、China National Knowledge Infrastructure (CNKI)

Theme (ulcerative colitis) and theme (hyperbaric oxygen) in Chinese

### 4、WanFang database

Theme (ulcerative colitis) and theme (hyperbaric oxygen) in Chinese

### 5、VIP database

Any words (ulcerative colitis) and any words (hyperbaric oxygen) in Chinese
